# Supplementary material for: Current nutrition promotion, beliefs and barriers among cancer nurses in Australia and New Zealand
Source: PeerJ. 2015 Nov 10;3:e1396. doi: 10.7717/peerj.1396 (PMC4647604; doi:10.7717/peerj.1396)
Supplement: Supplemental Information 1 [file peerj-03-1396-s001.xls]

## Sheet: all questions COMPACT
	Number	RespondentID	Age - Open-Ended Response	Sex	Sex2	Please list all PROFESSIONAL QUALIFICATIONS for which you currently hold - Open-Ended Response2	Years practicing - Open-Ended Response	What is the specific cancer/tumour group you primarily work with? - Open-Ended Response	What is the specific cancer/tumour group you primarily work with? - Open-Ended Response2	Is the hospital/practice where you work public or private?	Is the hospital/practice where you work public or private?2	Where is the hospital/practice located?	Where is the hospital/practice located?2	Please list any peer-reviewed journals you subscribe to: - Open-Ended Response	You subscribe to any peer-reviewed journals (yes/no)	At your hospital/practice who is the primary person responsible for promoting HEALTHY EATING to your cancer patients	At your hospital/practice who is the primary person responsible for promoting HEALTHY EATING to your cancer patients2	Please indicate the stage(s) at which HEALTHY EATING is promoted (Tick all that apply) - Pre-Treatment	Please indicate the stage(s) at which HEALTHY EATING is promoted (Tick all that apply) - During Treatment	Please indicate the stage(s) at which HEALTHY EATING is promoted (Tick all that apply) - Post-Treatment	Please indicate the stage(s) at which HEALTHY EATING is promoted (Tick all that apply) - Don't know	I am regularly physically active as defined as	I am regularly physically active as defined as 2	I eat healthy on a regular basis	I eat healthy on a regular basis2	I am a current smoker	I am a current smoker2	What benefits may HEALTHY EATING have for your cancer patients: - Improve health related quality of life	What benefits may HEALTHY EATING have for your cancer patients: - Improve health related quality of life2	What benefits may HEALTHY EATING have for your cancer patients: - Improve weight management	What benefits may HEALTHY EATING have for your cancer patients: - Improve weight management2	What benefits may HEALTHY EATING have for your cancer patients: - Improve mental health	What benefits may HEALTHY EATING have for your cancer patients: - Improve mental health2	What benefits may HEALTHY EATING have for your cancer patients: - Improve activities of daily living	What benefits may HEALTHY EATING have for your cancer patients: - Improve activities of daily living2	What benefits may HEALTHY EATING have for your cancer patients: - Reduce risk of cancer recurrence	What benefits may HEALTHY EATING have for your cancer patients: - Reduce risk of cancer recurrence2	What benefits may HEALTHY EATING have for your cancer patients: - Reduce risk of other chronic diseases	What benefits may HEALTHY EATING have for your cancer patients: - Reduce risk of other chronic diseases2	What benefits may HEALTHY EATING have for your cancer patients: - Reduce tumour specific comorbidities	What benefits may HEALTHY EATING have for your cancer patients: - Reduce tumour specific comorbidities2	What benefits may HEALTHY EATING have for your cancer patients: - No benefits	What benefits may HEALTHY EATING have for your cancer patients: - No benefits2	From the list of factors below, please indicate the THREE most likely to prevent you from promoting HEALTHY EATING to your cancer patients (with 1 being the most likely) - Lack of time	From the list of factors below, please indicate the THREE most likely to prevent you from promoting HEALTHY EATING to your cancer patients (with 1 being the most likely) - Risk to patient	From the list of factors below, please indicate the THREE most likely to prevent you from promoting HEALTHY EATING to your cancer patients (with 1 being the most likely) - Lack of adequate support structures	From the list of factors below, please indicate the THREE most likely to prevent you from promoting HEALTHY EATING to your cancer patients (with 1 being the most likely) - Lack of knowledge	From the list of factors below, please indicate the THREE most likely to prevent you from promoting HEALTHY EATING to your cancer patients (with 1 being the most likely) - Lack of expertise	From the list of factors below, please indicate the THREE most likely to prevent you from promoting HEALTHY EATING to your cancer patients (with 1 being the most likely) - I do not promote healthy eating
	1	2973536462	63	Female	1	2	46	All types as a District Nurse	3	Public	1	Rural	1	KaiTiaki	1	Me	0	Pre-Treatment	During Treatment	Post-Treatment		5 or more 30 minute sessions of MODERATE intensity exercise	0	Yes	0	No	0	Agree	3	Disagree	2	Agree	3	Strongly Agree	4	Agree	3	Agree	3	Agree	3	Strongly Disagree	1	3		2
	2	2953120520	47	Female	1	3	20	Haematology	7	Public	1	Metro	0		0	Me	0	Pre-Treatment	During Treatment			I am not regularly physically active	2	Yes	0	Yes	1	Strongly Agree	4	Agree	3	Strongly Agree	4	Strongly Agree	4	Disagree	2	Agree	3	Strongly Disagree	1	Strongly Disagree	1	2		3		1
	3	2948911875	49	Female	1	1	14	All	3	Public	1	Metro	0		0	Nutritionist/Dietician	1		During Treatment			5 or more 30 minute sessions of MODERATE intensity exercise	0	Yes	0	No	0	Strongly Agree	4	Strongly Agree	4	Strongly Agree	4	Strongly Agree	4	Strongly Agree	4	Strongly Agree	4	Strongly Agree	4	Strongly Disagree	1
	4	2931093566	35	Female	1	3	6	All	3	Public	1	Metro	0	ONS, IVNNZ	1	Nutritionist/Dietician	1		During Treatment	Post-Treatment		3 or more 20 minute sessions of HIGH intensity exercise	1	Yes	0	No	0	Agree	3	Agree	3	Agree	3	Agree	3	Disagree	2	Disagree	2	Disagree	2	Disagree	2			1
	5	2931081165	28	Female	1	1	8	None	3	Public	1	Metro	0		0	Nutritionist/Dietician	1		During Treatment			5 or more 30 minute sessions of MODERATE intensity exercise	0	Yes	0	No	0	Agree	3	Agree	3	Disagree	2	Disagree	2	Agree	3	Agree	3	Disagree	2	Disagree	2	3			1	2
	6	2923885455	37	Female	1	1	15	Radiation Oncology/head and neck cancer	8	Public	1	Regional	2		0	Oncologist	2	Pre-Treatment	During Treatment			5 or more 30 minute sessions of MODERATE intensity exercise	0	Yes	0	No	0	Agree	3	Agree	3	Agree	3	Disagree	2	Agree	3	Agree	3	Disagree	2	Strongly Disagree	1	1
	7	2919209849	45	Female	1	2	26	lung and bowel are main two	5	Public	1	Metro	0		0	Don't know	3				Don't know	3 or more 20 minute sessions of HIGH intensity exercise	1	Yes	0	No	0	Strongly Agree	4	Strongly Agree	4	Strongly Agree	4	Strongly Agree	4	Strongly Agree	4	Agree	3	Disagree	2	Strongly Disagree	1	1		2
	8	2919046732	50	Female	1	2	30	All cancers	3	Private	0	Metro	0	Best Practice	1	Me	0	Pre-Treatment	During Treatment	Post-Treatment		I am not regularly physically active	2	Yes	0	No	0	Strongly Agree	4	Strongly Agree	4	Agree	3	Agree	3	Agree	3	Agree	3	Agree	3		0
	9	2916890129	65	Female	1	1	32	Palliative Care	4	Public	1	Regional	2	International Journal of Palliative Nursing	1	Me	0		During Treatment			3 or more 20 minute sessions of HIGH intensity exercise	1	Yes	0	No	0	Agree	3		0		0		0		0		0		0		0		1
	10	2914203796	59	Female	1	1	20	inpatient Oncology and haematology	7	Public	1	Regional	2		0	Me	0	Pre-Treatment	During Treatment	Post-Treatment		3 or more 20 minute sessions of HIGH intensity exercise	1	Yes	0	No	0	Strongly Agree	4	Strongly Agree	4	Strongly Agree	4	Strongly Agree	4	Strongly Agree	4	Strongly Agree	4	Strongly Agree	4	Strongly Disagree	1
	11	2913424743	44	Female	1	1	20	Lung	5	Public	1	Metro	0	Too many to list 30+	1	Nutritionist/Dietician	1	Pre-Treatment	During Treatment	Post-Treatment		I am not regularly physically active	2	Yes	0	No	0	Agree	3	Agree	3	Agree	3	Agree	3	Agree	3	Agree	3	Agree	3	Disagree	2
	12	2913130545	51	Female	1	2	33	all cancers	3	Public	1	Rural	1		0	Nutritionist/Dietician	1		During Treatment	Post-Treatment		I am not regularly physically active	2	Yes	0	No	0	Agree	3	Agree	3	Agree	3	Agree	3	Agree	3	Agree	3	Agree	3	Strongly Disagree	1
	13	2912996960	43	Female	1	3	23	Mainly general (& prostate)	3	Public	1	Metro	0		0	Don't know	3	Pre-Treatment	During Treatment	Post-Treatment		5 or more 30 minute sessions of MODERATE intensity exercise	0	Yes	0	No	0	Agree	3	Strongly Agree	4	Agree	3	Agree	3	Agree	3	Strongly Agree	4	Agree	3	Disagree	2		3	2		1
	14	2911730450	58	Female	1	1	22	Palliative	4	Public	1	Rural	1	Nil	1	Oncologist	2	Pre-Treatment	During Treatment	Post-Treatment		5 or more 30 minute sessions of MODERATE intensity exercise	0	Yes	0	No	0	Agree	3	Strongly Agree	4	Strongly Agree	4	Strongly Agree	4	Agree	3		0	Agree	3	Strongly Disagree	1	1
	15	2911510200	49	Female	1	1	21	Haematology	7	Public	1	Metro	0	Nil - access through the medical library	1	Nutritionist/Dietician	1	Pre-Treatment	During Treatment	Post-Treatment		5 or more 30 minute sessions of MODERATE intensity exercise	0	Yes	0	No	0	Strongly Agree	4	Strongly Agree	4	Agree	3	Agree	3	Agree	3	Agree	3	Agree	3	Strongly Disagree	1
	16	2907757160	43	Female	1	2	25	patients having chemotherapy	3	Public	1	Regional	2		0	Nutritionist/Dietician	1	Pre-Treatment	During Treatment	Post-Treatment		3 or more 20 minute sessions of HIGH intensity exercise	1	Yes	0	No	0	Strongly Agree	4	Strongly Agree	4	Strongly Agree	4	Strongly Agree	4	Agree	3	Agree	3	Agree	3	Disagree	2
	17	2907594931	25	Female	1	2	3.5	General Inpatient Ward	3	Public	1	Metro	0	Kai Tiaki New Zealand	1	Me	0	Pre-Treatment	During Treatment	Post-Treatment		3 or more 20 minute sessions of HIGH intensity exercise	1	Yes	0	No	0	Strongly Agree	4	Strongly Agree	4	Strongly Agree	4	Strongly Agree	4	Strongly Agree	4	Strongly Agree	4	Strongly Agree	4		0
	18	2907545247	41	Female	1	2	11	Varied	3	Public	1	Metro	0		0	Other (please specify)	4	Pre-Treatment				5 or more 30 minute sessions of MODERATE intensity exercise	0	Yes	0	No	0	Strongly Agree	4	Strongly Agree	4	Strongly Agree	4	Strongly Agree	4	Agree	3	Strongly Agree	4	Agree	3	Strongly Disagree	1
	19	2907096347	58	Female	1	1	29	No specific group	3	Public	1	Metro	0		0	Me	0	Pre-Treatment	During Treatment	Post-Treatment		5 or more 30 minute sessions of MODERATE intensity exercise	0	Yes	0	No	0	Agree	3	Agree	3	Agree	3	Agree	3	Agree	3	Agree	3	Agree	3	Strongly Disagree	1
	20	2907070748	44	Female	1	2	20	All medical oncology and mailgnant haematology	3	Public	1	Metro	0		0	Nutritionist/Dietician	1		During Treatment	Post-Treatment		3 or more 20 minute sessions of HIGH intensity exercise	1	Yes	0	No	0	Strongly Agree	4	Strongly Agree	4	Strongly Agree	4	Strongly Agree	4	Strongly Agree	4	Strongly Agree	4	Strongly Agree	4	Strongly Disagree	1			3	1	2
	21	2904529327	36	Female	1	2	14	All paediatric cancers	8	Public	1	Metro	0	None	1	Nutritionist/Dietician	1		During Treatment	Post-Treatment		5 or more 30 minute sessions of MODERATE intensity exercise	0	Yes	0	No	0	Strongly Agree	4	Strongly Agree	4	Strongly Agree	4	Strongly Agree	4	Strongly Agree	4	Strongly Agree	4	Strongly Agree	4	Strongly Disagree	1
	22	2904510514	64	Female	1	3	43	Colorectal	6	Public	1	Regional	2	Collegian Praxis Kai Tiaki	1	Me	0	Pre-Treatment				I am not regularly physically active	2	Yes	0	No	0	Agree	3	Agree	3	Agree	3	Agree	3	Agree	3	Agree	3	Agree	3		0	1		2
	23	2904006841	39	Female	1	1	12	All kin the outpatient setting	3	Public	1	Metro	0	Kai Tiaka	1	Other (please specify)	4	Pre-Treatment	During Treatment	Post-Treatment		5 or more 30 minute sessions of MODERATE intensity exercise	0	Yes	0	No	0	Strongly Agree	4	Strongly Agree	4	Strongly Agree	4	Agree	3	Disagree	2	Agree	3	Agree	3	Strongly Disagree	1	2		3
	24	2903868649	24	Female	1	2	3	acute inpatient ward for onc/haem	3	Public	1	Metro	0		0	Nutritionist/Dietician	1				Don't know	3 or more 20 minute sessions of HIGH intensity exercise	1	Yes	0	No	0	Agree	3	Agree	3	Disagree	2	Disagree	2	Agree	3	Disagree	2	Disagree	2	Agree	3
	25	2902844759	56	Female	1	2	24	Palliative care	4	Public	1		3	NZNO Gerontology Nurses Section, Cancer Nurses Section of NZNO.	1	Other (please specify)	4		During Treatment			3 or more 20 minute sessions of HIGH intensity exercise	1	Yes	0	No	0	Agree	3	Agree	3	Agree	3	Agree	3	Agree	3	Agree	3	Agree	3	Strongly Disagree	1				2	1
	26	2902469667	60	Female	1	2	35	palliative	4	Private	0	Rural	1		0	Me	0	Pre-Treatment	During Treatment	Post-Treatment		3 or more 20 minute sessions of HIGH intensity exercise	1	Yes	0	No	0		0		0		0		0		0		0		0		0
	27	2902442192	40	Female	1	1	16	breast, bowel	2	Public	1	Rural	1		0	Me	0		During Treatment			3 or more 20 minute sessions of HIGH intensity exercise	1	Yes	0	No	0	Agree	3	Agree	3		0		0		0		0		0		0			2		1
	28	2902405531	63	Female	1	2	22	as above	3	Public	1	Regional	2		0	Me	0		During Treatment	Post-Treatment		3 or more 20 minute sessions of HIGH intensity exercise	1	Yes	0	No	0	Agree	3	Disagree	2	Agree	3	Agree	3	Disagree	2	Agree	3	Disagree	2	Disagree	2	3
	29	2902402441	59	Female	1	3	25	haematology	7	Public	1	Metro	0		0		5						3		2		2		0		0		0		0		0		0		0		0
	30	2902072996	49	Female	1	2	7	Work with all of them	3	Public	1	Rural	1	BMJ	1	Nutritionist/Dietician	1		During Treatment	Post-Treatment		I am not regularly physically active	2	No	1	No	0	Agree	3	Agree	3	Strongly Agree	4		0	Disagree	2	Agree	3	Disagree	2	Strongly Disagree	1	2			3
	31	2901792170	39	Female	1	1	18	chemotherapy administration	3	Public	1	Rural	1	Kai tiaki	1	Me	0	Pre-Treatment	During Treatment	Post-Treatment		5 or more 30 minute sessions of MODERATE intensity exercise	0	Yes	0	No	0	Agree	3	Agree	3	Agree	3	Agree	3	Agree	3	Agree	3	Agree	3	Strongly Disagree	1	1			2
	32	2901673488	68	Male	0	1	48	Any - most common bowel cancer	1	Public	1	Rural	1		0	Other (please specify)	4		During Treatment			I am not regularly physically active	2	Yes	0	No	0	Strongly Agree	4	Strongly Agree	4	Strongly Agree	4	Strongly Agree	4	Strongly Agree	4	Strongly Agree	4	Strongly Agree	4		0
	33	2901594803	58	Female	1	2	40	All except Haemotology	3	Public	1	Metro	0		0	Nutritionist/Dietician	1		During Treatment			5 or more 30 minute sessions of MODERATE intensity exercise	0	Yes	0	No	0	Agree	3	Agree	3	Agree	3	Agree	3		0		0		0		0	1		3
	34	2901419012	53	Female	1	2	30	Multiple groups	3	Public	1	Regional	2	International journal of Palliative Care Nursing, End of Life Care at St. Christopher's	1		5						3		2		2		0		0		0		0		0		0		0		0
	35	2901291698	30	Female	1	1	10	Non specific - Haem, Med and Rad Onc	3	Public	1	Regional	2	NZNO journal	1	Me	0	Pre-Treatment				3 or more 20 minute sessions of HIGH intensity exercise	1	Yes	0	No	0	Agree	3	Strongly Agree	4	Agree	3	Strongly Agree	4	Agree	3	Strongly Agree	4	Disagree	2	Strongly Disagree	1	3
	36	2901163757	45	Female	1	2	21	Head & Neck	8	Public	1	Metro	0	None but Otago Uni Library member	1	Other (please specify)	4	Pre-Treatment	During Treatment	Post-Treatment		5 or more 30 minute sessions of MODERATE intensity exercise	0	No	1	No	0	Strongly Agree	4	Strongly Agree	4	Strongly Agree	4	Strongly Agree	4	Agree	3	Strongly Agree	4	Agree	3	Strongly Disagree	1	1					2
	37	2899958526	63	Female	1	3	39	Generic	3	Public	1	Metro	0		0		5						3		2		2		0		0		0		0		0		0		0		0
	38	2899947549	54	Female	1	2	30	All cancer types	3	Private	0	Regional	2		0		5						3		2		2		0		0		0		0		0		0		0		0
	39	2899935820	59	Female	1	1	31	Palliative care beds in Howick Baptist Hospital	4	Private	0	Regional	2	Kai Tiaki	1	Other (please specify)	4	Pre-Treatment	During Treatment	Post-Treatment		5 or more 30 minute sessions of MODERATE intensity exercise	0	Yes	0	No	0	Strongly Agree	4	Agree	3	Strongly Agree	4	Strongly Agree	4	Strongly Agree	4	Agree	3	Agree	3	Strongly Disagree	1	1		2		3
	40	2899927850	52	Female	1	2	20	as above	3		0	Metro	0	ONS	1	Me	0	Pre-Treatment	During Treatment	Post-Treatment		3 or more 20 minute sessions of HIGH intensity exercise	1	Yes	0	No	0	Strongly Agree	4	Strongly Agree	4	Strongly Agree	4	Strongly Agree	4	Strongly Agree	4	Strongly Agree	4	Strongly Agree	4	Strongly Disagree	1	2
	41	2899904658	58	Female	1		14	Head and neck Cancer	8	Public	1	Metro	0	Clinical Journal of Oncology	1	Nutritionist/Dietician	1	Pre-Treatment	During Treatment	Post-Treatment		5 or more 30 minute sessions of MODERATE intensity exercise	0	Yes	0	No	0	Strongly Agree	4	Agree	3	Agree	3	Agree	3	Agree	3	Agree	3	Agree	3	Strongly Disagree	1			1
	42	2899893637	44	Female	1	2	20	head and neck	8	Private	0	Regional	2		0	Me	0	Pre-Treatment	During Treatment	Post-Treatment		5 or more 30 minute sessions of MODERATE intensity exercise	0	Yes	0	No	0		0		0		0		0		0		0		0		0
	43	2899860937	54	Female	1	3	32		9		2		3		0		5						3		2		2		0		0		0		0		0		0		0		0
	44	2899856812	54	Female	1	1	35	any	3	Public	1	Rural	1		0		5						3		2		2		0		0		0		0		0		0		0		0
	45	2899842180	52	Female	1	2	35	All tumour streams focussing on the period from suspicion to first treatment and processes and systems involved in faster cancer treatment.	3	Public	1	Regional	2	NZNO journal	1		5	Pre-Treatment	During Treatment	Post-Treatment		I am not regularly physically active	2	Yes	0	No	0	Strongly Agree	4	Strongly Agree	4	Strongly Agree	4	Strongly Agree	4	Strongly Agree	4	Strongly Agree	4	Strongly Agree	4	Strongly Disagree	1
	46	2899834161	52	Female	1	1	30	haematology	7	Public	1	Regional	2		0	Me	0	Pre-Treatment	During Treatment	Post-Treatment		3 or more 20 minute sessions of HIGH intensity exercise	1	Yes	0	No	0	Agree	3	Agree	3	Agree	3	Agree	3	Agree	3	Strongly Agree	4	Agree	3	Strongly Disagree	1
	47	2899799275	53	Female	1	2	35	Generalist (small hospital)	3	Public	1	Rural	1	College Of Nurses Kai Tiaki NZNO	1	Me	0	Pre-Treatment	During Treatment	Post-Treatment		5 or more 30 minute sessions of MODERATE intensity exercise	0	Yes	0	No	0	Strongly Agree	4	Strongly Agree	4	Strongly Agree	4	Strongly Agree	4	Strongly Agree	4	Strongly Agree	4	Strongly Agree	4	Strongly Disagree	1	1	2
	48	2899797987	43	Female	1	3	20	general med onc and colorectal patients	3	Public	1	Metro	0	Kai tiaki Nursing Research	1	Other (please specify)	4	Pre-Treatment	During Treatment	Post-Treatment		5 or more 30 minute sessions of MODERATE intensity exercise	0	Yes	0	No	0	Strongly Agree	4	Strongly Agree	4	Strongly Agree	4	Strongly Agree	4	Strongly Agree	4	Strongly Agree	4	Strongly Agree	4	Strongly Disagree	1	1		2
	49	2899797441	63	Female	1	3	30	Bowel, lung, renal breast	3	Public	1	Regional	2	Oncology nursing society	1	Other (please specify)	4		During Treatment	Post-Treatment		I am not regularly physically active	2	Yes	0	No	0	Agree	3	Agree	3	Agree	3	Agree	3	Agree	3	Agree	3	Disagree	2	Strongly Disagree	1
	50	2899742744	35	Female	1	2	12	All	3	Public	1	Metro	0		0	Nutritionist/Dietician	1				Don't know	3 or more 20 minute sessions of HIGH intensity exercise	1	Yes	0	No	0	Agree	3	Agree	3	Agree	3	Disagree	2	Agree	3	Agree	3	Agree	3	Strongly Disagree	1	2				3
	51	2899733856	51	Female	1	2	42	Mainly gynaecological cancers but a variety of others also	2	Public	1	Regional	2		0	Me	0	Pre-Treatment	During Treatment	Post-Treatment		5 or more 30 minute sessions of MODERATE intensity exercise	0	Yes	0	No	0	Agree	3	Agree	3	Agree	3	Agree	3	Agree	3	Agree	3	Agree	3	Disagree	2		2
	52	2899618940	38	Female	1	3	5	Head and neck	8	Private	0	Metro	0		0	Nutritionist/Dietician	1			Post-Treatment		I am not regularly physically active	2	Yes	0	No	0	Strongly Agree	4	Strongly Agree	4	Strongly Agree	4	Strongly Agree	4	Disagree	2	Agree	3	Strongly Disagree	1	Strongly Disagree	1
	53	2899612914	58	Female	1	3	6	general (acute oncology)	3	Public	1	Metro	0		0	Other (please specify)	4					5 or more 30 minute sessions of MODERATE intensity exercise	0	Yes	0	No	0	Agree	3	Agree	3	Agree	3	Disagree	2	Agree	3	Strongly Agree	4	Agree	3	Strongly Disagree	1	1
	54	2899607864	40	Female	1	3	13	Across the spectrum	3	Public	1	Metro	0		0	Me	0	Pre-Treatment	During Treatment	Post-Treatment		5 or more 30 minute sessions of MODERATE intensity exercise	0	Yes	0	No	0	Strongly Agree	4	Strongly Agree	4	Strongly Agree	4	Strongly Agree	4	Agree	3	Strongly Agree	4	Strongly Agree	4	Strongly Disagree	1	1		2
	55	2899578913	60	Female	1	2	43	Breast	2	Public	1	Regional	2		0	Me	0	Pre-Treatment	During Treatment	Post-Treatment		5 or more 30 minute sessions of MODERATE intensity exercise	0	Yes	0	No	0	Strongly Agree	4	Strongly Agree	4	Strongly Agree	4	Strongly Agree	4	Strongly Agree	4	Strongly Agree	4	Agree	3		0		2	1		3
	56	2899558360	59	Female	1	2	21	Gynaecology ( womens reproductive organs )	2	Public	1	Regional	2		0	Other (please specify)	4	Pre-Treatment	During Treatment	Post-Treatment		5 or more 30 minute sessions of MODERATE intensity exercise	0	Yes	0	No	0	Disagree	2	Agree	3	Disagree	2	Agree	3	Agree	3	Agree	3	Agree	3		0
	57	2899535220	52	Female	1	3	>30	Breast Bowel prostate	2	Public	1	Regional	2		0	Nutritionist/Dietician	1	Pre-Treatment				5 or more 30 minute sessions of MODERATE intensity exercise	0	Yes	0	No	0	Agree	3	Agree	3	Agree	3	Agree	3	Agree	3	Agree	3	Agree	3	Strongly Disagree	1	1		3
	58	2899496729	43	Female	1	2	22	gastric colon lung brain	6	Public	1	Rural	1		0		5						3		2		2		0		0		0		0		0		0		0		0
	59	2899496599	63	Female	1	1	>40	No specific group	3	Public	1	Rural	1	Kai Tiaki Nursing Wound Care	1	Other (please specify)	4				Don't know	5 or more 30 minute sessions of MODERATE intensity exercise	0	Yes	0	No	0	Agree	3	Agree	3	Agree	3	Agree	3	Strongly Disagree	1	Disagree	2	Disagree	2	Disagree	2	2	1
	60	2899491582	58	Female	1	3	35	all groups	3	Public	1	Regional	2	International Journal of Palliative Care Nursing Online End Of Life Care Journal St Christophers	1	Oncologist	2	Pre-Treatment	During Treatment	Post-Treatment		5 or more 30 minute sessions of MODERATE intensity exercise	0	Yes	0	No	0	Strongly Agree	4	Strongly Agree	4	Strongly Agree	4	Agree	3	Disagree	2	Agree	3	Agree	3	Strongly Disagree	1	1	2	3
	61	2899481489	60	Female	1	2	43	All	3	Public	1	Regional	2	Kai Tiaki Nursing NZ & LOGIC	1	Other (please specify)	4	Pre-Treatment	During Treatment	Post-Treatment		5 or more 30 minute sessions of MODERATE intensity exercise	0	Yes	0	No	0	Strongly Agree	4	Strongly Agree	4	Strongly Agree	4	Strongly Agree	4	Agree	3	Agree	3	Agree	3	Strongly Disagree	1
	62	2899473701	41	Female	1	2	20	Breast	2	Public	1	Metro	0		0	Me	0	Pre-Treatment				5 or more 30 minute sessions of MODERATE intensity exercise	0	Yes	0	No	0	Strongly Agree	4	Strongly Agree	4	Agree	3	Agree	3	Agree	3	Strongly Agree	4	Agree	3	Strongly Disagree	1	1			2	3
	63	2899452610	52	Female	1	2	30	Leukaemias and solid tumours	7	Public	1	Regional	2	Oncology Nursing Society	1	Nutritionist/Dietician	1		During Treatment			5 or more 30 minute sessions of MODERATE intensity exercise	0	Yes	0	No	0	Disagree	2	Agree	3	Strongly Agree	4	Strongly Agree	4	Disagree	2	Agree	3	Disagree	2		0						3
	64	2899446121	62	Female	1	1			9		2		3		0		5						3		2		2		0		0		0		0		0		0		0		0
	65	2899444609	39	Female	1	2	18	Urogenital (Kidney, Bladder, Prostate, Testicular and Penile Cancer)	1	Public	1	Regional	2		0	Oncologist	2		During Treatment			5 or more 30 minute sessions of MODERATE intensity exercise	0	Yes	0	No	0	Agree	3	Strongly Agree	4	Agree	3	Agree	3	Strongly Agree	4	Strongly Agree	4	Agree	3		0	1		2	3
	66	2899440476	56	Female	1	3	34	Gynaecological	2	Public	1	Regional	2	International Journal of Gynaecological cancer Lancet Best practice & Research Clinical Obstetrics and Gynaecology Nursing Times International Journal of Radiation Oncology Biology Physics European Journal of Cancer Journal of Nursing Edcation	1	Nutritionist/Dietician	1	Pre-Treatment	During Treatment	Post-Treatment		5 or more 30 minute sessions of MODERATE intensity exercise	0	Yes	0	No	0	Agree	3	Strongly Agree	4	Agree	3	Agree	3	Strongly Agree	4	Strongly Agree	4		0		0
	67	2899438800	68	Female	1	1	41	Leukaemia	7	Private	0	Rural	1		0	Other (please specify)	4	Pre-Treatment	During Treatment	Post-Treatment		I am not regularly physically active	2	Yes	0	No	0		0		0		0		0		0		0		0		0
	68	2899436827	52	Female	1	2	31	Breast	2	Public	1	Metro	0	Medscape	1	Me	0	Pre-Treatment	During Treatment	Post-Treatment		5 or more 30 minute sessions of MODERATE intensity exercise	0	Yes	0	No	0	Agree	3	Strongly Agree	4	Agree	3	Agree	3	Agree	3	Strongly Agree	4	Agree	3		0	3		1		2
	69	2899435335	30	Female	1	2	2	Palliative care	4	Public	1	Regional	2		0	Me	0				Don't know	5 or more 30 minute sessions of MODERATE intensity exercise	0	No	1	No	0		0		0		0		0		0		0		0		0
	70	2899426528	31	Female	1	2	10	General	3	Public	1	Regional	2		0	Other (please specify)	4	Pre-Treatment	During Treatment	Post-Treatment		5 or more 30 minute sessions of MODERATE intensity exercise	0	Yes	0	No	0	Strongly Agree	4	Strongly Agree	4	Agree	3	Agree	3	Agree	3	Agree	3	Agree	3	Strongly Disagree	1						2
	71	2899421434	50	Female	1	2		4	9	Public	1	Metro	0		0	Nutritionist/Dietician	1					5 or more 30 minute sessions of MODERATE intensity exercise	0	Yes	0		2	Strongly Agree	4	Strongly Agree	4	Strongly Agree	4	Strongly Agree	4		0		0		0		0	1
	72	2899419338	48	Female	1	2	30	Lung Cancer	5	Public	1	Regional	2		0		5						3		2		2		0		0		0		0		0		0		0		0
	73	2899418499	25	Female	1	1	4	Paediatrics - all cancers	8	Public	1	Metro	0		0	Nutritionist/Dietician	1	Pre-Treatment	During Treatment	Post-Treatment		3 or more 20 minute sessions of HIGH intensity exercise	1	Yes	0	No	0	Agree	3	Agree	3	Agree	3	Agree	3	Strongly Agree	4	Strongly Agree	4	Agree	3	Strongly Disagree	1
	74	2899417011	53	Female	1	2	33	Gastro-intestinal tumours	6	Public	1	Metro	0	ONS	1	Me	0	Pre-Treatment	During Treatment	Post-Treatment		3 or more 20 minute sessions of HIGH intensity exercise	1	Yes	0	No	0	Agree	3	Agree	3	Agree	3	Agree	3	Agree	3	Agree	3	Agree	3	Strongly Disagree	1
	75	2899415170	43	Female	1	1	13	Upper GI	5	Public	1	Metro	0		0	Nutritionist/Dietician	1	Pre-Treatment	During Treatment	Post-Treatment		5 or more 30 minute sessions of MODERATE intensity exercise	0	Yes	0	No	0	Strongly Agree	4	Strongly Agree	4	Strongly Agree	4	Strongly Agree	4	Agree	3	Agree	3	Agree	3	Strongly Disagree	1	1		3		2
	76	2899410503	45	Female	1	2	12	Palliative care / Early diagnosis	4	Private	0	Regional	2		0	Nutritionist/Dietician	1	Pre-Treatment	During Treatment	Post-Treatment		5 or more 30 minute sessions of MODERATE intensity exercise	0	Yes	0	No	0	Agree	3	Agree	3	Strongly Agree	4	Agree	3	Agree	3	Agree	3	Agree	3	Agree	3	1	3		2
	77	2899407901	44	Female	1	1	13	Most of the tumour streams	3	Public	1	Rural	1	Best Practice.	1	Nutritionist/Dietician	1	Pre-Treatment	During Treatment	Post-Treatment		5 or more 30 minute sessions of MODERATE intensity exercise	0	Yes	0	No	0	Strongly Agree	4	Strongly Agree	4	Agree	3	Agree	3	Disagree	2	Strongly Agree	4	Disagree	2	Strongly Disagree	1	2	3
	78	2899406953	41	Female	1	2	18	Lung Cancer	5	Public	1	Regional	2	Lung Cancer Research Review Respiratory Research Review Health Advisory Board	1	Don't know	3	Pre-Treatment	During Treatment	Post-Treatment		5 or more 30 minute sessions of MODERATE intensity exercise	0	Yes	0	No	0	Strongly Agree	4	Strongly Agree	4	Agree	3	Agree	3	Agree	3	Agree	3	Agree	3		0	2		1
	79	2899406410	52	Female	1	1	31	Lung	5	Public	1	Regional	2		0	Me	0	Pre-Treatment	During Treatment	Post-Treatment		5 or more 30 minute sessions of MODERATE intensity exercise	0	Yes	0	No	0	Strongly Agree	4	Strongly Agree	4	Strongly Agree	4	Strongly Agree	4	Strongly Agree	4	Strongly Agree	4	Strongly Agree	4	Strongly Disagree	1	3		2		1
	80	2899406260	50	Female	1	3	32	colorectal cancer	6	Public	1	Regional	2		0	Nutritionist/Dietician	1	Pre-Treatment	During Treatment	Post-Treatment		3 or more 20 minute sessions of HIGH intensity exercise	1	Yes	0	No	0	Strongly Agree	4	Strongly Agree	4	Disagree	2	Strongly Agree	4	Disagree	2	Agree	3	Disagree	2	Strongly Disagree	1
	81	2837580813	44		2	2	25	all tumour tuypes and non-cancer diagnoses	3	Public	1	Metro	0	ANMF	1	Don't know	3				Don't know	5 or more 30 minute sessions of MODERATE intensity exercise	0	No	1	No	0		0		0		0		0		0		0		0		0
	82	2837451093	48	Female	1	1	28	Breast Cancer	2	Private	0	Metro	0		0	Other (please specify)	4	Pre-Treatment	During Treatment	Post-Treatment		5 or more 30 minute sessions of MODERATE intensity exercise	0	Yes	0	No	0	Strongly Agree	4	Agree	3	Agree	3	Agree	3	Agree	3	Agree	3		0	Agree	3
	83	2835616741	44	Female	1	3	23	Gynaecological/Upper GI/Haematology	2	Private	0	Metro	0	Journal of Nurse Practitioners Cancer Forum	1	Nutritionist/Dietician	1	Pre-Treatment	During Treatment			I am not regularly physically active	2	Yes	0	No	0		0		0		0		0		0		0		0		0
	84	2828075702	64	Female	1	2	42	breast cancer	2	Public	1	Metro	0	CNSA magazine. Oncology Nursing Forum. clinical journal of oncology nursing australian college of nursing journal ANF journal COSA journal	1	Me	0		During Treatment	Post-Treatment		I am not regularly physically active	2	Yes	0	No	0	Strongly Agree	4	Strongly Agree	4	Strongly Agree	4	Strongly Agree	4	Strongly Agree	4	Strongly Agree	4	Strongly Agree	4	Strongly Disagree	1	1		2		3
	85	2827561651	59	Female	1	2	39	All adult cancers	3	Private	0	Regional	2	Cancer Nursing Journal of Cancer Survivorship-Research & Practice Palliative & Supportive Care Online-NEJM Jounal Watch, NCBI/PubMed, Medscape.	1	Me	0	Pre-Treatment	During Treatment	Post-Treatment		5 or more 30 minute sessions of MODERATE intensity exercise	0	Yes	0	No	0	Agree	3	Strongly Agree	4	Agree	3	Disagree	2	Agree	3	Agree	3	Disagree	2	Strongly Disagree	1
	86	2822313097	32	Female	1	2	6	Mixed Oncology - colorectal, breast, pancreatic, lung	3	Public	1	Regional	2		0	Nutritionist/Dietician	1	Pre-Treatment	During Treatment	Post-Treatment		I am not regularly physically active	2	Yes	0	No	0	Agree	3	Agree	3	Strongly Agree	4	Strongly Agree	4	Agree	3	Agree	3	Agree	3	Strongly Disagree	1		1			2
	87	2820572073	48	Female	1	3	30	Prostate Cancer	1	Public	1	Regional	2	International Journal of Urological Nursing	1	Don't know	3				Don't know	I am not regularly physically active	2	Yes	0	No	0	Agree	3	Agree	3	Agree	3	Agree	3	Agree	3	Agree	3	Agree	3		0
	88	2820288648	52	Female	1	2	30	Colon and Bowel	6	Public	1	Metro	0	GENCA Australian Day Surgery Nurses Assoc Journal	1	Nutritionist/Dietician	1	Pre-Treatment	During Treatment	Post-Treatment		I am not regularly physically active	2	Yes	0	No	0	Strongly Agree	4	Strongly Agree	4	Strongly Agree	4	Strongly Agree	4	Strongly Agree	4	Strongly Agree	4	Strongly Agree	4	Strongly Disagree	1	1		3
	89	2818411635	60	Female	1	1	40	Varied	3	Public	1	Regional	2		0	Me	0	Pre-Treatment				I am not regularly physically active	2		2	No	0	Agree	3	Agree	3	Agree	3	Agree	3	Disagree	2	Agree	3	Agree	3	Disagree	2	1		2
	90	2818269807	52	Male	0	1	5	breast,colon,pancreatic,lung,	3	Public	1	Regional	2	ACN journal	1	Nutritionist/Dietician	1	Pre-Treatment	During Treatment	Post-Treatment		5 or more 30 minute sessions of MODERATE intensity exercise	0	Yes	0	No	0	Strongly Agree	4	Strongly Agree	4	Strongly Agree	4	Agree	3	Agree	3	Agree	3	Agree	3	Strongly Disagree	1			1		2	3
	91	2818142376	47	Female	1	3	26	Head and Neck cancer	8	Public	1	Metro	0	AJCN Supportive Care in Cancer Cancer Forum	1	Nutritionist/Dietician	1	Pre-Treatment	During Treatment	Post-Treatment		5 or more 30 minute sessions of MODERATE intensity exercise	0	Yes	0	No	0	Strongly Agree	4	Strongly Agree	4	Strongly Agree	4	Strongly Agree	4	Agree	3	Agree	3	Strongly Agree	4		0
	92	2816063047	59	Female	1	1	30	Breast	2	Private	0	Metro	0	The Australian Journal of Cancer Nursing	1	Me	0	Pre-Treatment	During Treatment	Post-Treatment		3 or more 20 minute sessions of HIGH intensity exercise	1	Yes	0	No	0	Strongly Agree	4	Strongly Agree	4	Strongly Agree	4	Strongly Agree	4	Strongly Agree	4	Strongly Agree	4	Strongly Agree	4	Strongly Disagree	1	1		2		3
	93	2815943037	42	Female	1	2	21	Breast Cancer	2	Public	1	Rural	1	Oncology update	1	Me	0	Pre-Treatment	During Treatment	Post-Treatment		I am not regularly physically active	2	Yes	0	No	0	Strongly Agree	4	Strongly Agree	4	Strongly Agree	4	Strongly Agree	4	Strongly Agree	4	Strongly Agree	4	Strongly Agree	4		0
	94	2814430696	52	Female	1	2	25		9	Public	1	Metro	0		0	Me	0	Pre-Treatment	During Treatment	Post-Treatment		5 or more 30 minute sessions of MODERATE intensity exercise	0	Yes	0	No	0	Agree	3	Agree	3	Strongly Agree	4	Agree	3	Agree	3	Agree	3		0	Strongly Disagree	1	3		2
	95	2814239833	54	Female	1	2	33	Breast	2	Private	0	Metro	0	MJA, Medscape CE nurses, Elsevier,	1	Me	0	Pre-Treatment	During Treatment	Post-Treatment		I am not regularly physically active	2	Yes	0	No	0	Strongly Agree	4	Strongly Agree	4	Agree	3	Agree	3	Strongly Agree	4	Strongly Agree	4	Agree	3	Strongly Disagree	1
	96	2814187598	46	Female	1	3	28	all	3	Public	1	Rural	1	have email subscriptions to many-and access to others through La Trobe University	1	Me	0	Pre-Treatment	During Treatment	Post-Treatment		I am not regularly physically active	2	Yes	0	No	0	Strongly Agree	4	Strongly Agree	4	Strongly Agree	4	Strongly Agree	4	Strongly Agree	4	Strongly Agree	4	Strongly Agree	4	Strongly Disagree	1
	97	2814162622	44	Female	1	1	5	Breast and Melanoma	2	Private	0	Metro	0		0	Me	0	Pre-Treatment	During Treatment	Post-Treatment		I am not regularly physically active	2	Yes	0	No	0	Agree	3	Strongly Agree	4	Agree	3	Agree	3	Agree	3	Agree	3	Agree	3	Strongly Disagree	1	3		2
	98	2814144861	52	Female	1	2	11	Breast	2	Public	1	Rural	1	oncology, international journal of Mental Health Nursing	1	Nutritionist/Dietician	1	Pre-Treatment	During Treatment	Post-Treatment		5 or more 30 minute sessions of MODERATE intensity exercise	0	Yes	0	No	0	Strongly Agree	4	Strongly Agree	4	Strongly Agree	4	Strongly Agree	4	Strongly Agree	4	Strongly Agree	4	Strongly Agree	4	Strongly Disagree	1
	99	2814141187	57	Female	1	2	20	Breast Cancer	2	Public	1	Rural	1		0	Nutritionist/Dietician	1		During Treatment	Post-Treatment		5 or more 30 minute sessions of MODERATE intensity exercise	0	Yes	0	No	0	Strongly Agree	4	Strongly Agree	4	Strongly Agree	4	Agree	3	Agree	3	Strongly Agree	4	Agree	3	Strongly Disagree	1	1		3		2
	100	2814092166	52	Female	1	2	30	All tumour streams	3	Public	1	Rural	1		0	Nutritionist/Dietician	1	Pre-Treatment				I am not regularly physically active	2	Yes	0	No	0	Strongly Agree	4	Strongly Agree	4	Strongly Agree	4	Strongly Agree	4	Agree	3	Agree	3	Disagree	2	Strongly Disagree	1	2		3		1
	101	2814074404	29	Female	1	2	8	All types- mostly haematology	7	Public	1	Metro	0		0	Nutritionist/Dietician	1	Pre-Treatment	During Treatment	Post-Treatment		3 or more 20 minute sessions of HIGH intensity exercise	1	Yes	0	No	0		0		0		0		0		0		0		0		0
	102	2814056197	56	Female	1	2	38	Haematology	7	Public	1	Metro	0	nil	1	Nutritionist/Dietician	1		During Treatment	Post-Treatment		I am not regularly physically active	2	Yes	0	No	0	Strongly Agree	4	Strongly Agree	4	Agree	3	Agree	3	Agree	3	Agree	3	Agree	3	Strongly Disagree	1	1
	103	2812249129	56	Male	0	3	28	no specific group	3	Public	1	Metro	0	Nil	1	Nutritionist/Dietician	1	Pre-Treatment	During Treatment	Post-Treatment		5 or more 30 minute sessions of MODERATE intensity exercise	0	No	1	No	0	Strongly Agree	4	Strongly Agree	4	Disagree	2	Agree	3	Agree	3	Agree	3	Agree	3	Strongly Disagree	1
	104	2806940008		Female	1	3	23	not specific	3	Public	1	Metro	0	ACNJ Cancer Forum Psycho Oncology	1	Other (please specify)	4	Pre-Treatment	During Treatment	Post-Treatment		3 or more 20 minute sessions of HIGH intensity exercise	1	Yes	0	No	0	Agree	3	Agree	3	Agree	3	Agree	3	Agree	3	Agree	3	Agree	3	Strongly Disagree	1					3
	105	2797409915	49	Female	1	1	20	Breast	2	Private	0	Regional	2		0	Me	0	Pre-Treatment	During Treatment	Post-Treatment		I am not regularly physically active	2	Yes	0	No	0	Strongly Agree	4	Strongly Agree	4	Strongly Agree	4	Strongly Agree	4	Agree	3	Agree	3	Agree	3	Strongly Disagree	1			2	3	1
	106	2793634631	56	Female	1	3	39	All cancers	3	Public	1	Metro	0	Tobacco Control Aust Journal of Cancer Nursing	1	Nutritionist/Dietician	1	Pre-Treatment				5 or more 30 minute sessions of MODERATE intensity exercise	0	Yes	0	No	0	Strongly Agree	4	Strongly Agree	4	Strongly Agree	4	Strongly Agree	4	Strongly Agree	4	Strongly Agree	4	Strongly Agree	4	Strongly Disagree	1
	107	2791513319	36	Female	1	3	14.5	Skin Lymphoma	8	Public	1	Metro	0	Nil	1	Other (please specify)	4	Pre-Treatment	During Treatment	Post-Treatment		I am not regularly physically active	2	Yes	0	No	0	Strongly Agree	4	Strongly Agree	4	Strongly Agree	4	Strongly Agree	4	Strongly Agree	4	Strongly Agree	4	Strongly Agree	4	Strongly Disagree	1		1	2		3
	108	2790501529		Female	1	3	5	Sarcoma	8	Public	1	Metro	0		0	Nutritionist/Dietician	1				Don't know	3 or more 20 minute sessions of HIGH intensity exercise	1	Yes	0	No	0	Agree	3	Agree	3	Agree	3	Agree	3	Agree	3	Agree	3	Agree	3	Strongly Disagree	1	1			2	3
	109	2790484505	36	Female	1	3	14	Gynaeoncology	2	Public	1	Metro	0	International Journal Gyane onc CNSA Cancer Forum	1	Other (please specify)	4			Post-Treatment		5 or more 30 minute sessions of MODERATE intensity exercise	0	Yes	0	No	0	Strongly Agree	4		0	Strongly Agree	4	Strongly Agree	4	Strongly Agree	4	Strongly Agree	4	Strongly Agree	4		0
	110	2790471828	52	Female	1	3	31	upper gi cancer	6	Public	1	Metro	0	ONS --USA	1	Nutritionist/Dietician	1	Pre-Treatment	During Treatment	Post-Treatment		3 or more 20 minute sessions of HIGH intensity exercise	1	Yes	0	No	0	Agree	3	Agree	3	Disagree	2	Agree	3	Disagree	2	Disagree	2	Disagree	2	Strongly Disagree	1
	111	2790471715	31	Female	1	2	9	Leukaemia and MDS	7	Public	1	Metro	0		0	Nutritionist/Dietician	1		During Treatment	Post-Treatment		3 or more 20 minute sessions of HIGH intensity exercise	1	Yes	0	No	0	Strongly Agree	4	Strongly Agree	4	Strongly Agree	4	Strongly Agree	4	Disagree	2	Strongly Agree	4	Strongly Agree	4	Strongly Disagree	1	3		1		2
	112	2785658430	37	Female	1	2	17	All types	3	Private	0	Metro	0		0	Me	0	Pre-Treatment	During Treatment	Post-Treatment		3 or more 20 minute sessions of HIGH intensity exercise	1	Yes	0	No	0	Agree	3	Agree	3	Agree	3	Agree	3	Agree	3	Agree	3	Agree	3		0
	113	2781625671	41	Female	1	3	6	Prostate Cancer	1	Public	1	Regional	2	Urological Nurses	1	Other (please specify)	4	Pre-Treatment	During Treatment	Post-Treatment		I am not regularly physically active	2	Yes	0	No	0	Strongly Agree	4	Strongly Agree	4	Strongly Agree	4	Strongly Agree	4	Agree	3	Agree	3	Agree	3	Strongly Disagree	1
	114	2770872623	53	Female	1	1	32	Breast and Prostate and abit of all types and metastatic also	2	Private	0	Metro	0		0	Don't know	3				Don't know	3 or more 20 minute sessions of HIGH intensity exercise	1	Yes	0	No	0	Strongly Agree	4	Strongly Agree	4	Strongly Agree	4	Strongly Agree	4	Strongly Agree	4	Strongly Agree	4	Strongly Agree	4	Strongly Disagree	1	3		1		2
	115	2770660949	55	Female	1	3	32	Head and Neck/ Lung / Colorectal	8	Public	1	Metro	0	Oncology Nursing Forum Clinical Journal of Oncology Nursing Asia-Pacific Journal of Clinical Oncology Supportive Care in Cancer The Australian Journal of Cancer Nursing	1	Nutritionist/Dietician	1		During Treatment			5 or more 30 minute sessions of MODERATE intensity exercise	0	Yes	0	No	0	Strongly Agree	4	Strongly Agree	4	Agree	3	Agree	3	Strongly Agree	4	Strongly Agree	4	Agree	3	Strongly Disagree	1			1		2
	116	2770646102	71	Female	1	3	33	all tumour groups	3	Public	1	Metro	0	Access to through library - Oncology and Palliative Care medical nursing journals	1	Nutritionist/Dietician	1		During Treatment			5 or more 30 minute sessions of MODERATE intensity exercise	0	Yes	0	Yes	1	Strongly Agree	4	Agree	3	Agree	3	Agree	3	Disagree	2	Agree	3	Disagree	2	Strongly Disagree	1					3
	117	2770316490	52	Female	1	1	35	children	8	Public	1	Regional	2	Australian Nursing Journal	1	Me	0	Pre-Treatment	During Treatment	Post-Treatment		3 or more 20 minute sessions of HIGH intensity exercise	1	Yes	0	No	0	Strongly Agree	4	Strongly Agree	4	Strongly Agree	4	Strongly Agree	4	Agree	3	Strongly Agree	4	Disagree	2	Strongly Disagree	1
	118	2769264444	54	Male	0	1	26	Prostate	1	Public	1	Regional	2	Online journal subscriptions via the ministry of Health NSW	1	Me	0	Pre-Treatment	During Treatment	Post-Treatment		5 or more 30 minute sessions of MODERATE intensity exercise	0	Yes	0	No	0	Strongly Agree	4	Strongly Agree	4	Strongly Agree	4	Strongly Agree	4	Strongly Agree	4	Strongly Agree	4	Agree	3	Strongly Disagree	1	1				2
	119	2769150541	48	Female	1	3	30		9	Public	1	Metro	0		0	Nutritionist/Dietician	1				Don't know	5 or more 30 minute sessions of MODERATE intensity exercise	0	Yes	0	No	0	Strongly Agree	4	Disagree	2	Agree	3	Agree	3	Agree	3	Agree	3	Agree	3	Strongly Disagree	1	1		2	3
	120	2769135107	28	Male	0	3	2	Prostate Cancer / Genitourinary	1	Public	1	Metro	0		0	Me	0	Pre-Treatment	During Treatment	Post-Treatment		5 or more 30 minute sessions of MODERATE intensity exercise	0	Yes	0	No	0	Strongly Agree	4	Strongly Agree	4	Agree	3	Agree	3	Agree	3	Strongly Agree	4	Agree	3	Strongly Disagree	1
	121	2768483863	59	Female	1	3	40	Prostate	1	Private	0	Metro	0	I J Urol Nursing Urologic Nursing	1	Me	0		During Treatment			3 or more 20 minute sessions of HIGH intensity exercise	1	Yes	0	No	0	Agree	3	Strongly Agree	4	Agree	3	Agree	3	Disagree	2	Agree	3	Disagree	2	Strongly Disagree	1	1		2
	122	2767635261	23	Female	1	1	0.5	Bone marrow cancers ie leukaemia, lymphoma, myeloma. Also solid tumours such as breast, prostate & bowel cancer.	3	Public	1	Metro	0		0	Nutritionist/Dietician	1	Pre-Treatment	During Treatment	Post-Treatment		5 or more 30 minute sessions of MODERATE intensity exercise	0	Yes	0	No	0	Strongly Agree	4	Strongly Agree	4	Strongly Agree	4	Strongly Agree	4	Strongly Agree	4	Strongly Agree	4	Strongly Agree	4	Strongly Disagree	1	3		1		2
	123	2747389993	56	Female	1	2	38	gynaecological cancer	2	Public	1	Metro	0	Australian Journal of Cancer Nursing	1	Other (please specify)	4	Pre-Treatment	During Treatment	Post-Treatment		3 or more 20 minute sessions of HIGH intensity exercise	1	Yes	0	No	0	Strongly Agree	4	Strongly Agree	4	Agree	3	Strongly Agree	4	Agree	3	Strongly Agree	4	Disagree	2	Strongly Disagree	1
[truncated: 12 more columns]
